# Supplementary material for: Overcoming Difficulties in Completing The Given Tasks As A Sales Administration Staff At Grand Serela Hotel
Source: Royal Society of Chemistry journal article supplement (doi:10.1039/d2fo01800d), 2011-01-01
Supplement: d2fo01800d1.pdf [file d2fo01800d1.pdf]

1 **Triacylglycerol structure and composition of human milk fat**  
2 **substitute affect the absorption of fatty acids and calcium, lipid**  
3 **metabolism and bile acid metabolism in newly-weaned Sprague–**  
4 **Dawley rats**

5 Lin Zhu <sup>a</sup>, Shuaizhen Fang <sup>a</sup>, Wenwen Liu <sup>a</sup>, Hong Zhang <sup>b</sup>, Yaqiong Zhang <sup>a\*</sup>,  
6 Zhuohong Xie <sup>c</sup>, Puyu Yang <sup>a</sup>, Jianchun Wan <sup>b</sup>, Boyan Gao <sup>a</sup>, Liangli (Lucy) Yu <sup>c</sup>

7

8 <sup>a</sup> Institute of Food and Nutraceutical Science, School of Agriculture and Biology,  
9 Shanghai Jiao Tong University, Shanghai 200240, China

10 <sup>b</sup> Wilmar (Shanghai) Biotechnology Research & Development Center Co. Ltd.,  
11 Shanghai 200137, China

12 <sup>c</sup> Department of Nutrition and Food Science, University of Maryland, College Park,  
13 Maryland 20742, United States

14

15

16

17 **Declarations of interest: none.**

18 \* To whom correspondence should be addressed:

19 Yaqiong Zhang, Ph. D.

20 Tel.: 021-34204538; E-mail: yqzhang2006@sjtu.edu.cn

**Table S1. Fatty acid composition, *sn*-2 palmitic acid content and OPL to OPO ratio in four experimental fats.**

|                                        | CF    | HMFS1 | HMFS2 | HMFS3 |
|----------------------------------------|-------|-------|-------|-------|
| C8:0 (%)                               | 0.52  | 0.32  | 0.41  | 0.28  |
| C10:0 (%)                              | 0.62  | 0.63  | 0.63  | 0.66  |
| C12:0 (%)                              | 3.45  | 1.68  | 2.38  | 2.14  |
| C14:0 (%)                              | 3.09  | 3.23  | 3.18  | 3.39  |
| C16:0 (%)                              | 21.78 | 22.12 | 24.08 | 23.42 |
| C16:1 (%)                              | 0.26  | 0.37  | 0.32  | 0.35  |
| C18:0 (%)                              | 4.70  | 4.57  | 4.67  | 4.82  |
| C18:1 (%)                              | 41.37 | 42.06 | 39.45 | 39.10 |
| C18:2 n-6 (%)                          | 19.23 | 20.36 | 19.75 | 20.81 |
| C18:3 n-3 (%)                          | 3.00  | 2.05  | 2.51  | 2.58  |
| <i>Sn</i> -2 palmitic acid content (%) | 15.54 | 54.36 | 60.02 | 57.87 |
| OPL to OPO ratio                       | 0.4   | 0.3   | 0.9   | 1.4   |

**Table S2. The detailed diet formulations.**

|                     | CF     |       | HMFS1  |       | HMFS2  |       | HMFS3  |       |
|---------------------|--------|-------|--------|-------|--------|-------|--------|-------|
|                     | gm%    | kcal% | gm%    | kcal% | gm%    | kcal% | gm%    | kcal% |
| Protein             | 22.2   | 20.3  | 22.2   | 20.3  | 22.2   | 20.3  | 22.2   | 20.3  |
| Carbohydrate        | 53.3   | 48.8  | 53.3   | 48.8  | 53.3   | 48.8  | 53.3   | 48.8  |
| Fat                 | 15.0   | 30.8  | 15.0   | 30.8  | 15.0   | 30.8  | 15.0   | 30.8  |
| Total               |        | 100   |        | 100   |        | 100   |        | 100   |
| Ingredient          | gm     | kcal  | gm     | kcal  | gm     | kcal  | gm     | kcal  |
| Casein              | 200    | 800   | 200    | 800   | 200    | 800   | 200    | 800   |
| L-Cystine           | 3      | 12    | 3      | 12    | 3      | 12    | 3      | 12    |
| Corn Starch         | 255    | 1020  | 255    | 1020  | 255    | 1020  | 255    | 1020  |
| Maltodextrin 10     | 132    | 528   | 132    | 528   | 132    | 528   | 132    | 528   |
| Sucrose             | 91     | 364   | 91     | 364   | 91     | 364   | 91     | 364   |
| Celluse, BW200      | 50     | 0     | 50     | 0     | 50     | 0     | 50     | 0     |
| Fat Sample CF       | 137    | 1233  |        |       |        |       |        |       |
| Fat Sample HMFS1    |        |       | 137    | 1233  |        |       |        |       |
| Fat Sample HMFS2    |        |       |        |       | 137    | 1233  |        |       |
| Fat Sample HMFS3    |        |       |        |       |        |       | 137    | 1233  |
| t-Butylhydroquinone | 0.0274 | 0     | 0.0274 | 0     | 0.0274 | 0     | 0.0274 | 0     |
| Mineral             | 35     | 0     | 35     | 0     | 35     | 0     | 35     | 0     |
| Vitamin             | 10     | 40    | 10     | 40    | 10     | 40    | 10     | 40    |
| Choline Bitartrate  | 2.5    | 0     | 2.5    | 0     | 2.5    | 0     | 2.5    | 0     |
